# Supplementary material for: 3D Mass Spectrometry Imaging Reveals a Very Heterogeneous Drug Distribution in Tumors
Source: PubMed Central journal article supplement (PMC5107992; doi:10.1038/srep37027), 2016-11-14
Supplement: srep37027-s4.pdf [file srep37027-s4.pdf]

# 3D MASS SPECTROMETRY IMAGING REVEALS A VERY HETEROGENEOUS DRUG DISTRIBUTION IN TUMORS

S. Giordano<sup>1</sup>, L. Morosi<sup>2</sup>, P. Veglianesi<sup>3</sup>, S.A. Licandro<sup>2</sup>, R. Frapolli<sup>2</sup>, M. Zucchetti<sup>2</sup>, G. Cappelletti<sup>4</sup>, L. Falciola<sup>4</sup>, V. Pifferi<sup>4</sup>, S. Visentin<sup>5</sup>, M. D'Incalci<sup>2</sup> and E. Davoli<sup>1\*</sup>

<sup>1</sup>*Environmental Health Sciences Department, Mass Spectrometry Laboratory, IRCCS Istituto di Ricerche Farmacologiche Mario Negri, Via La Masa 19, 20156 Milano, Italy*

<sup>2</sup>*Oncology Department, Cancer Pharmacology Laboratory, IRCCS Istituto di Ricerche Farmacologiche Mario Negri, Via La Masa 19, 20156 Milano, Italy*

<sup>3</sup>*Neuroscience Department, Biology of Neurodegenerative Disorders Laboratory, IRCCS Istituto di Ricerche Farmacologiche Mario Negri, Via La Masa 19, 20156 Milano, Italy*

<sup>4</sup>*Chemistry Department, University of Milano, Via Golgi 19, 20133 Milano, Italy*

<sup>5</sup>*Department of Molecular Biotechnology and Health Science, University of Torino, Via Nizza 52, 10126 Torino, Italy*

\*Correspondence to [enrico.davoli@marionegri.it](mailto:enrico.davoli@marionegri.it)

## SUPPLEMENTARY

Video 1| Three-dimensional model of PTX distribution inside mesothelioma 1.

Video 2| Three-dimensional model of PTX distribution inside mesothelioma 2.

Video 3| Three-dimensional model of PTX distribution inside mesothelioma 3.
